# Supplementary material
Source: PubMed Central journal article supplement (PMC9298180)

Fig. 4a

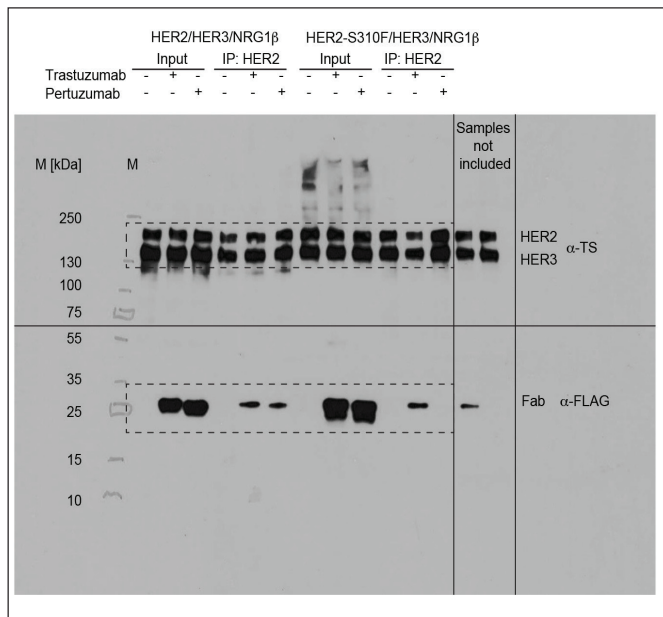

Extended Data Fig. 5e

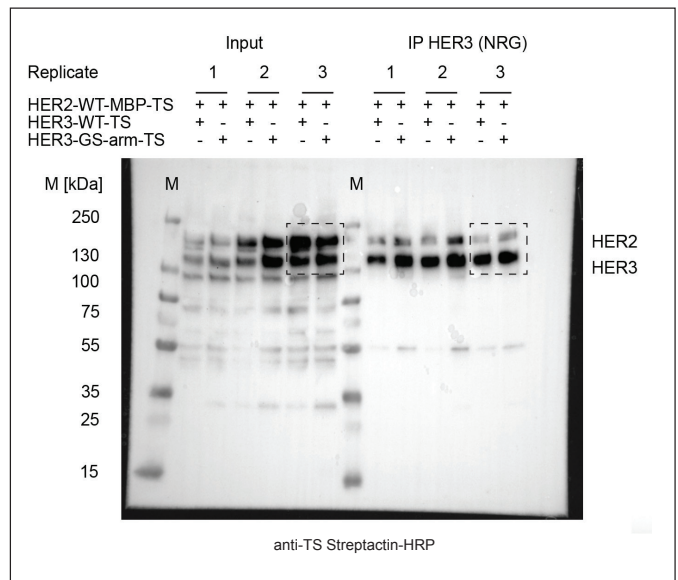

Extended Data Fig. 5g

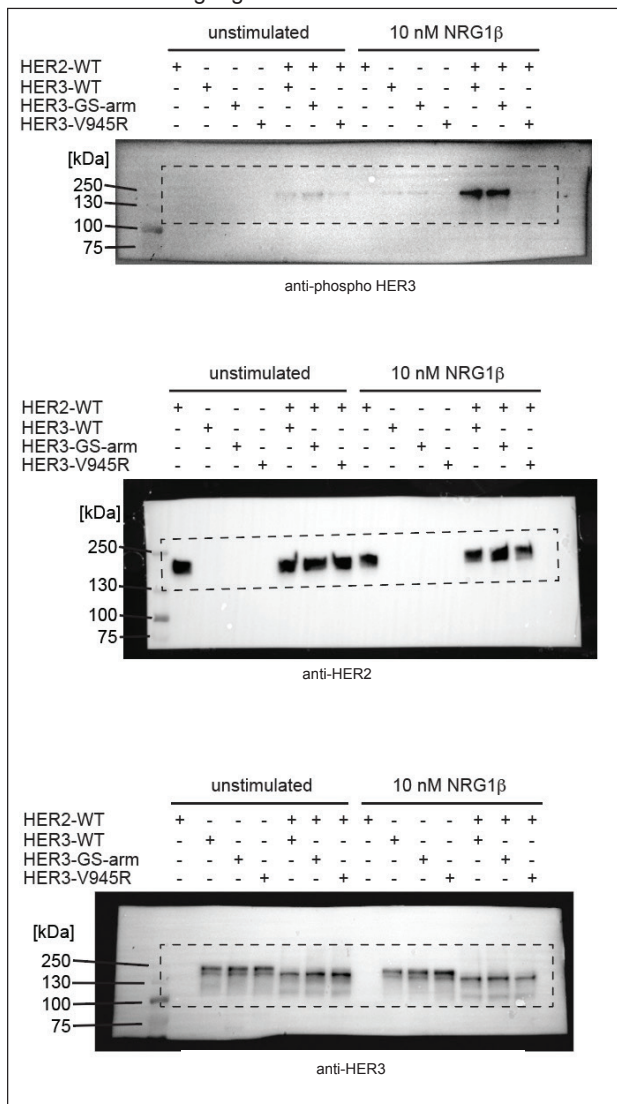

Extended Data Fig. 6a

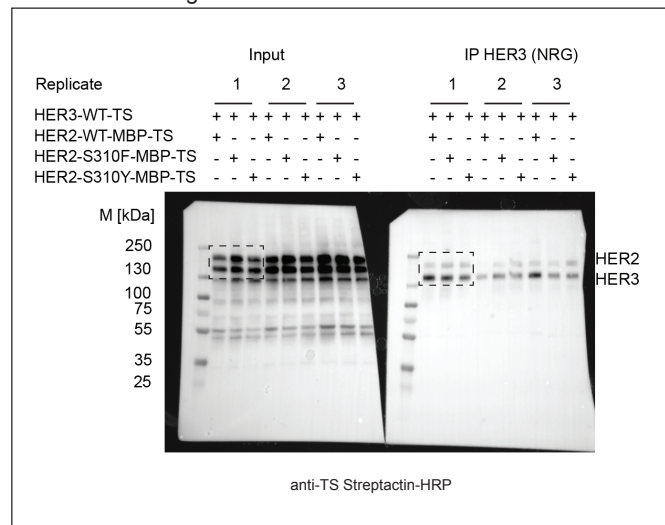

Extended Data Fig. 8d

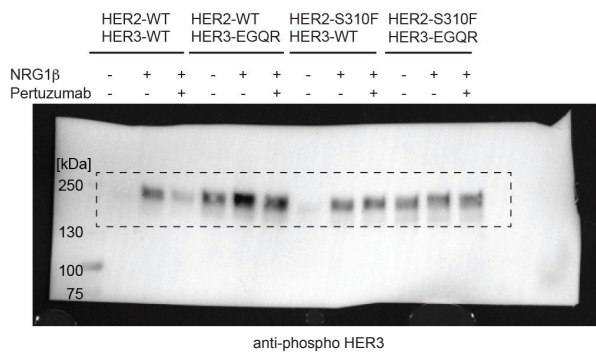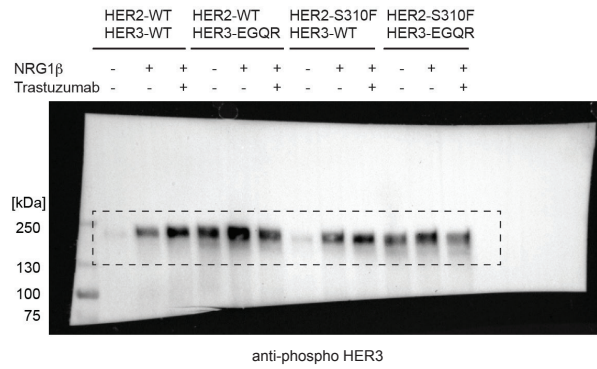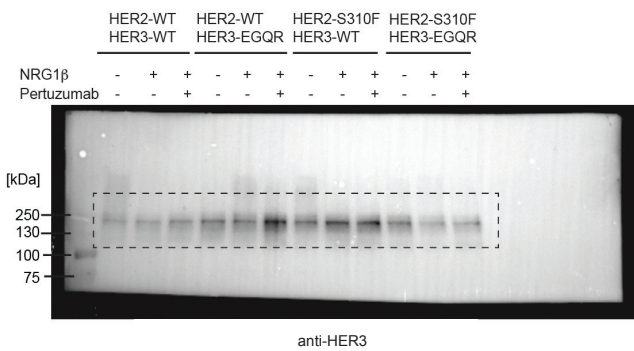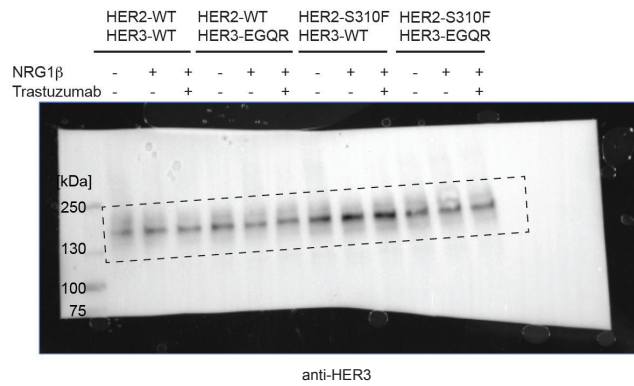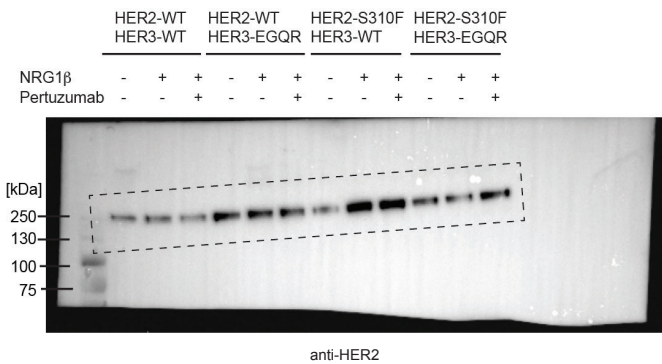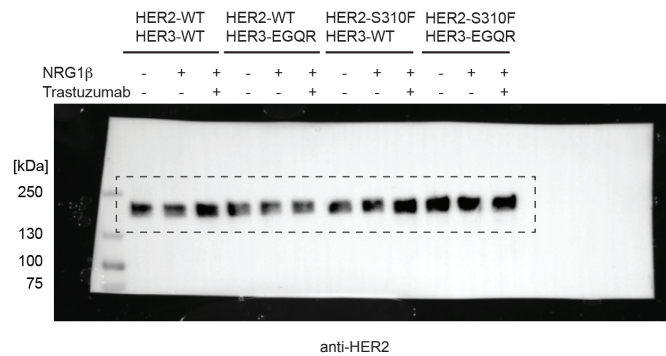

Supplement: NIHMS1821555-supplement-Supplementary_Figure_1.pdf [file NIHMS1821555-supplement-Supplementary_Figure_1.pdf]
